# Supplementary material for: Ratiometric optical thermometry based on a Dy3+, Eu3+ co-doped GdAl3(BO3)4 phosphor
Source: Royal Society of Chemistry journal article supplement (doi:10.1039/d2nj03805f), 2022-01-01
Supplement: d2nj03805f1.pdf [file d2nj03805f1.pdf]

Electronic Supplementary Material (ESM) for New Journal of Chemistry.

This journal is © The Royal Society of Chemistry and the Centre National de la  
Recherche Scientifique 2022

## **Electronic Supplementary Material**

### **Ratiometric optical thermometry based on Dy<sup>3+</sup>, Eu<sup>3+</sup> co-doped**

#### **GdAl<sub>3</sub>(BO<sub>3</sub>)<sub>4</sub> phosphor**

**Liqiong Yang, Yadan Ding\*, Xiaokun Wen, Hancheng Zhu, Guorui Wang,  
Xinghua Li and Xia Hong\***

*Key Laboratory of UV-Emitting Materials and Technology (Northeast Normal  
University), Ministry of Education, Changchun 130024, China.*

\*Corresponding authors: dingyd044@nenu.edu.cn (Y. Ding); xiahong@nenu.edu.cn  
(X. Hong)

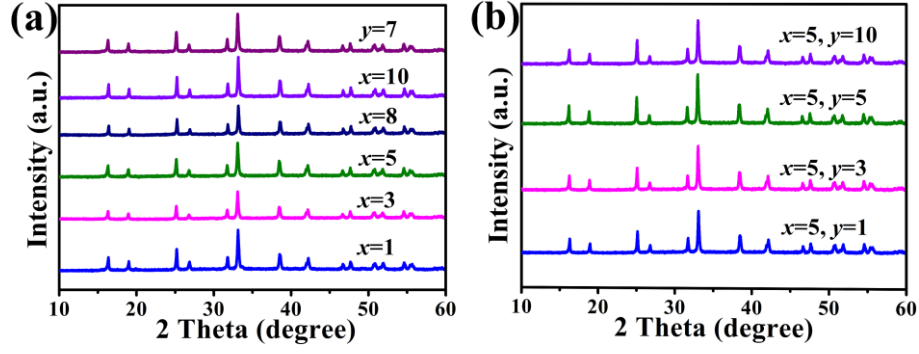

**Fig. S1.** XRD patterns of (a) the GAB:  $x\%$   $\text{Dy}^{3+}$  ( $x=1, 3, 5, 8$  and  $10$ ), GAB:  $y\%$   $\text{Eu}^{3+}$  ( $y=7$ ) and (b) the GAB:  $5\%$   $\text{Dy}^{3+}$ ,  $y\%$   $\text{Eu}^{3+}$  ( $y=1, 3, 5$  and  $10$ ) phosphors.

**Table S1.** The ionic radii of  $\text{Gd}^{3+}$ ,  $\text{Dy}^{3+}$ ,  $\text{Eu}^{3+}$ ,  $\text{Al}^{3+}$  and  $\text{B}^{3+}$  in the different fold of coordination.

| Ion              | Coordination | Ionic radius ( $\text{\AA}$ ) |
|------------------|--------------|-------------------------------|
| $\text{Gd}^{3+}$ | 6            | 1.053                         |
| $\text{Dy}^{3+}$ | 6            | 1.027                         |
| $\text{Eu}^{3+}$ | 6            | 1.066                         |
| $\text{Al}^{3+}$ | 6            | 0.390                         |
| $\text{B}^{3+}$  | 3            | 0.110                         |

**Table S2.** Parameters from Rietveld refinement of the GAB.

| Atom | Occupancy | x           | y          | z           | Uiso ( $\text{\AA}^2$ ) | Site |
|------|-----------|-------------|------------|-------------|-------------------------|------|
| Gd   | 1         | 0           | 0          | 0           | 0.0312                  | 3a   |
| Al   | 1         | 0.5550 (5)  | 0          | 0           | 0.0230                  | 9d   |
| B1   | 1         | 0           | 0          | 0.5         | 0.0610                  | 3b   |
| B2   | 1         | 0.4180 (5)  | 0          | 0.5         | 0.0480                  | 9e   |
| O1   | 1         | -0.1463 (8) | 0          | 0.5         | 0.0240                  | 9e   |
| O2   | 1         | 0.5720 (2)  | 0          | 0.5         | 0.0032                  | 9e   |
| O3   | 1         | 0.8658 (8)  | 0.2940 (7) | 0.5543 (10) | 0.0280                  | 18f  |

**Table S3.** Parameters from Rietveld refinement of the GAB: 5% Dy<sup>3+</sup>, 7% Eu<sup>3+</sup>.

| Atom | Occupancy | x           | y          | z           | Uiso (Å <sup>2</sup> ) | Site |
|------|-----------|-------------|------------|-------------|------------------------|------|
| Gd   | 0.8800    | 0           | 0          | 0           | 0.0200                 | 3a   |
| Dy   | 0.0499    | 0           | 0          | 0           | 0.0200                 | 3a   |
| Eu   | 0.0700    | 0           | 0          | 0           | 0.0200                 | 3a   |
| Al   | 1         | 0.5549 (5)  | 0          | 0           | 0.0040                 | 9d   |
| B1   | 1         | 0           | 0          | 0.5         | 0.0630                 | 3b   |
| B2   | 1         | 0.4210 (6)  | 0          | 0.5         | 0.0610                 | 9e   |
| O1   | 1         | -0.1458 (9) | 0          | 0.5         | 0.0160                 | 9e   |
| O2   | 1         | 0.5720 (2)  | 0          | 0.5         | 0.0064                 | 9e   |
| O3   | 1         | 0.8637 (9)  | 0.2935 (8) | 0.5547 (11) | 0.0150                 | 18f  |

**Table S4.** Main bond lengths of the GAB and GAB: 5% Dy<sup>3+</sup>, 7% Eu<sup>3+</sup>.

| Bond           | Length (Å) |
|----------------|------------|
| Gd1/Dy1/Eu1-O3 | 2.599 (9)  |
| Al-O1          | 1.942 (6)  |
| Al-O2          | 2.058 (14) |
| Al-O3          | 1.675 (8)  |
| B1-O1          | 1.356 (9)  |
| B2-O2          | 1.400 (6)  |
| B2-O3          | 1.290 (3)  |

**Table S5.** Main bond angles of the GAB and GAB: 5% Dy<sup>3+</sup>, 7% Eu<sup>3+</sup>.

| Bond           | Angle (°)   |
|----------------|-------------|
| O3-Gd/Dy/Eu-O3 | 77.6 (4)    |
|                | 86.2 (3)    |
|                | 101.89 (18) |
|                | 120.7 (3)   |
|                | 146.9 (3)   |
| O2-Al-O3       | 172.2 (5)   |
| O1-Al-O3       | 90.8 (4)    |
| O1-Al-O2       | 81.8 (5)    |
| O3-Al-O3       | 83.4 (6)    |
| O2-Al-O2       | 88.10 (19)  |
| O1-Al-O1       | 170.0 (4)   |
| O1-B1-O1       | 120 (4)     |
| O3-B2-O3       | 131 (4)     |
| O2-B2-O3       | 115 (2)     |

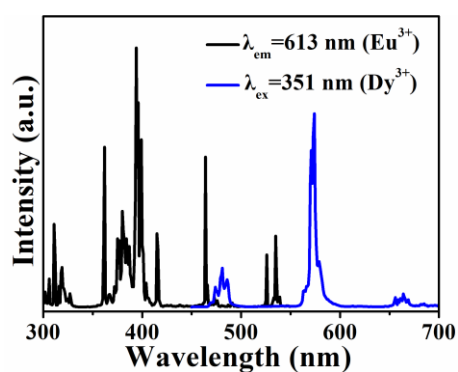

**Fig. S2.** The PL spectrum of GAB: 5% Dy<sup>3+</sup> phosphor under 351 nm excitation and PLE spectrum of GAB: 7% Eu<sup>3+</sup> phosphor monitored at 613 nm.

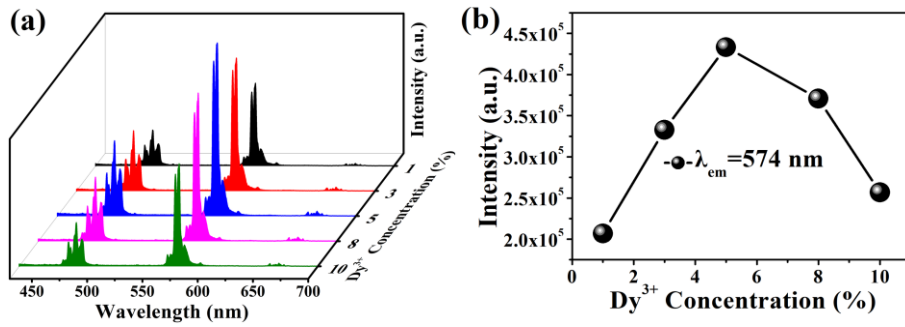

**Fig. S3.** (a) The PL spectra and (b) the  $\text{Dy}^{3+}$  concentration-dependent emission intensity at 574 nm of GAB:  $x\%$   $\text{Dy}^{3+}$  ( $x=1, 3, 5, 8$  and  $10$ ) phosphors under 351 nm excitation.

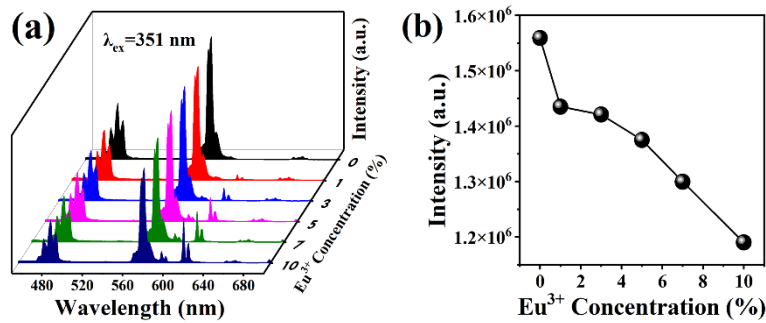

**Fig. S4.** (a) The PL spectra and (b) the  $\text{Eu}^{3+}$  concentration-dependent emission intensity at 574 nm of GAB:  $5\%$   $\text{Dy}^{3+}$ ,  $y\%$   $\text{Eu}^{3+}$  ( $y=0, 1, 3, 5, 7$  and  $10$ ) phosphors under 351 nm excitation.

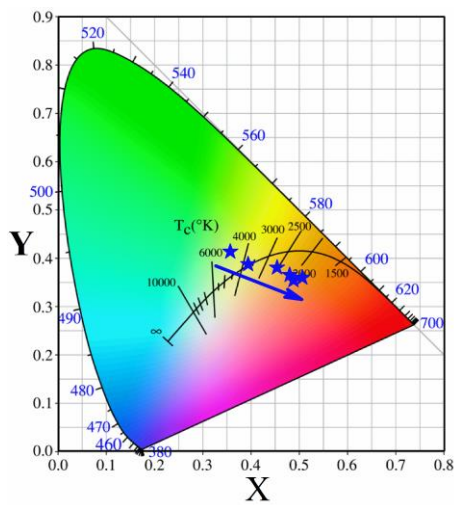

**Fig. S5.** The CIE chromaticity diagram of GAB:  $5\%$   $\text{Dy}^{3+}$ ,  $y\%$   $\text{Eu}^{3+}$  ( $y = 0, 1, 3, 5, 7$  and  $10$ ) phosphors at room temperature.

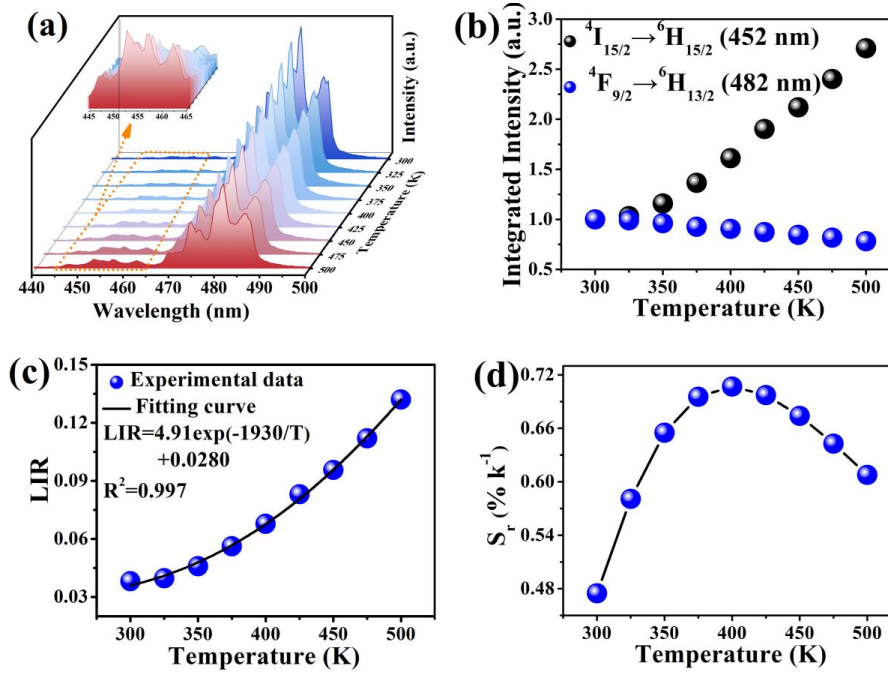

**Fig. S6.** (a) The temperature-dependent emission spectra of GAB: 5% Dy<sup>3+</sup> phosphor under 351 nm excitation from 300 to 500 K. The inset shows the enlarged view for the wavelength region of 445-465 nm. (b) The temperature-dependent integrated emission intensity relative to that at 300 K. The integral regions are 445-465 nm and 466-496 nm, respectively. (c) The LIR fitting curve and (d) the  $S_r$  of GAB: 5% Dy<sup>3+</sup> phosphor.

**Table S6.** Comparison of  $S_r$  of different optical thermometers based on LIR technology.

| Materials                                                                                | Temperature Range (K) | $S_{rmax}$ (% K <sup>-1</sup> ) | Ref. |
|------------------------------------------------------------------------------------------|-----------------------|---------------------------------|------|
| BiVO <sub>4</sub> :Nd <sup>3+</sup> (NPs)                                                | 310–523               | 1.53 (310 K)                    | [1]  |
| Ca <sub>2</sub> LaNbO <sub>6</sub> : Pr <sup>3+</sup>                                    | 313-573               | 0.89 (523 K)                    | [2]  |
| LaMgNbO <sub>3</sub> : Pr <sup>3+</sup>                                                  | 298-523               | 0.73 (473 K)                    | [3]  |
| Y <sub>2</sub> O <sub>3</sub> : Yb <sup>3+</sup> , Tm <sup>3+</sup>                      | 298-573               | 0.66 (298 K)                    | [4]  |
| Gd <sub>2</sub> O <sub>3</sub> : Yb <sup>3+</sup> , Er <sup>3+</sup>                     | 298-578               | 1.51 (298 K)                    | [5]  |
| g-C <sub>3</sub> N <sub>4</sub> /BaWO <sub>4</sub> : Yb <sup>3+</sup> , Er <sup>3+</sup> | 293-393               | 1.47 (393 K)                    | [6]  |
| Ca <sub>2</sub> NaMg <sub>2</sub> V <sub>3</sub> O <sub>12</sub> : Eu <sup>3+</sup>      | 303-503               | 1.67 (443 K)                    | [7]  |

|                                                                                       |         |              |           |
|---------------------------------------------------------------------------------------|---------|--------------|-----------|
| NaLuF <sub>4</sub> : Eu <sup>3+</sup> @g-C <sub>3</sub> N <sub>4</sub>                | 303-503 | 0.46 (383 K) | [8]       |
| LiCa <sub>3</sub> MgV <sub>3</sub> O <sub>12</sub> : Eu <sup>3+</sup>                 | 303-523 | 1.69 (383 K) | [9]       |
| Sr <sub>3</sub> Y(PO <sub>4</sub> ) <sub>3</sub> : Ho <sup>3+</sup> /Yb <sup>3+</sup> | 298-573 | 1.11 (298 K) | [10]      |
| GAB: Dy <sup>3+</sup>                                                                 | 300-500 | 0.71 (400 K) | This work |
| GAB: Dy <sup>3+</sup> , Eu <sup>3+</sup>                                              | 300-500 | 1.37 (475 K) | This work |

## References

- [1] P.M. Gschwend, F.H.L. Starsich, R.C. Keitel, S.E. Pratsinis, *Chem. Commun.*, 2019, **55**, 7147–7150.
- [2] A. Zhang, Z. Sun, Z. Wang, M. Jia, B.C. Choi, Z. Fu, J.H. Jeong, S.H. Park, *Scripta Mater.*, 2022, **211**, 114515.
- [3] H. Zhang, Z. Gao, G. Li, Y. Zhu, S. Liu, K. Li, Y. Liang, *Chem. Eng. J.*, 2020, **380**, 122491.
- [4] G. Chen, R. Lei, H. Wang, F. Huang, S. Zhao, S. Xu, *Opt. Mater.*, 2018, **77**, 233–239.
- [5] W. Zheng, B. Sun, Y. Li, T. Lei, R. Wang, J. Wu, *ACS Sustain. Chem. Eng.*, 2020, **8**, 9578-9588.
- [6] L. Xu, J. Liu, L. Pei, Y. Xu, Z. Xia, *J. Mater. Chem. C*, 2019, **7**, 6112-6119.
- [7] H. Zhou, N. Guo, X. Lü, Y. Ding, L. Wang, R. Ouyang, B. Shao, *J. Lumin.*, 2020, **217**, 116758.
- [8] P. Du, J. Tang, W. Li, L. Luo, *Chem. Eng. J.*, 2021, **406**, 127165.
- [9] H. Zhou, N. Guo, Q. Liang, Y. Ding, Y. Pan, Y. Song, R. Ouyang, Y. Miao, B. Shao, *Ceram. Int.*, 2019, **45**, 16651-16657.
- [10] W. Liu, X. Wang, Q. Zhu, X. Li, X. Sun, J.-G. Li, *Adv. Mater.*, 2019, **20**, 949–963.
